# Supplementary material for: Six- and eight-coordinate thio- and seleno-ether complexes of NbF5and some comparisons with NbCl5 and NbBr5 adducts
Source: Royal Society of Chemistry journal article supplement (doi:10.1039/b916336k), 2009-11-16
Supplement: b916336k.pdf [file b916336k.pdf]

## ELECTRONIC SUPPLEMENTARY INFORMATION

### Six- and eight-coordinate thio- and seleno-ether complexes of $\text{NbF}_5$ and some comparisons with $\text{NbCl}_5$ and $\text{NbBr}_5$ adducts

Marek Jura, William Levason, Raju Ratnani, Gillian Reid, and Michael Webster

$[\text{NbX}_5(\text{R}_2\text{E})]$  ( $\text{X} = \text{Cl}$  or  $\text{Br}$ ;  $\text{R}_2\text{E} = \text{Me}_2\text{S}$ ,  $\text{Et}_2\text{S}$ ,  $\text{Me}_2\text{Se}$ ;  $\text{X} = \text{Cl}$   $\text{R}_2\text{E} = \text{Me}_2\text{Te}$ ): (see Scheme 1). These complexes were made by direct combination of the constituents in anhydrous  $\text{CH}_2\text{Cl}_2$  for comparison purposes. All are very moisture-sensitive solids, ranging in colour from yellow  $[\text{NbCl}_5(\text{Me}_2\text{S})]$  through dark red  $[\text{NbBr}_5(\text{Me}_2\text{Se})]$ , to purple  $[\text{NbCl}_5(\text{Me}_2\text{Te})]$ , and are easily soluble in anhydrous  $\text{CH}_2\text{Cl}_2$ .<sup>10–14</sup> The purple  $[\text{NbCl}_5(\text{Me}_2\text{Te})]$  decomposes rapidly in solution and the solid becomes sticky in a few hours, turning dark green, clearly due to reduction of the niobium, and all spectroscopic measurements were made on freshly prepared samples.

The  $^1\text{H}$  NMR data on the isolated complexes are in agreement with published values.<sup>11,12,14</sup> The complexes exhibit two or three strong metal-halogen stretching modes in the IR spectra (Table SUP 1) (theory  $\text{C}_{4v} = 2a_1 + e$ ). The diffuse reflectance spectra for these  $d^0$  metal systems show the expected  $\pi(\text{X}) \rightarrow \text{Nb}$  and  $\pi(\text{chalcogen}) \rightarrow \text{Nb}$  charge transfer transitions, which are in generally good agreement with the more limited set of solution data of Vallotton and Merbach.<sup>13</sup> Multinuclear NMR spectroscopic data are given in Table SUP 1. The halide present is the dominant factor determining the observed chemical shifts (relative to  $[\text{NbCl}_6]^-$  in MeCN at  $\delta = 0$ ) with  $[\text{NbCl}_5(\text{L})]$   $\delta \sim +80$  and  $[\text{NbBr}_5(\text{L})]$   $\delta \sim +750$ , with changing S for Se or changing the R group having only small effects. The resonances sharpen on gentle cooling and then broaden at low temperatures, probably due to a combination of some dissociation at ambient temperatures and the effect of temperature upon the niobium quadrupolar relaxation rate. Addition of excess  $\text{R}_2\text{E}$  to the solutions has no effect on  $\delta(^{93}\text{Nb})$ , in agreement with the conclusions of Merbach from  $^1\text{H}$  NMR data, that seven-coordinate species do not form.<sup>11,14</sup> Attempts to

obtain  $[\text{NbCl}_4(\text{Me}_2\text{S})_2]^+$  from reaction in  $\text{CH}_2\text{Cl}_2$  solution of  $\text{NbCl}_5$  with two mol. equivs.  $\text{Me}_2\text{S}$  and  $\text{FeCl}_3$  (as chloride abstractor), failed, the  $^{93}\text{Nb}$  NMR spectrum showing only  $[\text{NbCl}_5(\text{Me}_2\text{S})]$ , and using the stronger abstractor  $\text{SbCl}_5$  results in decomposition. The  $^{77}\text{Se}\{^1\text{H}\}$  NMR spectra show large high frequency shifts from free  $\text{Me}_2\text{Se}$  which fall  $\text{X} = \text{F} > \text{Cl} > \text{Br}$  (Table SUP 1).

Crystal structures on two examples were obtained (Tables SUP 2 and SUP 3, Figs. SUP 1 and SUP 2). The  $[\text{NbBr}_5(\text{Me}_2\text{S})]$  shows a distorted octahedral geometry with the angles  $\text{Br}-\text{Nb}-\text{Br}$  involving the apical bromine  $\sim 97^\circ$ , those in the equatorial plane near  $90^\circ$ , and  $\text{S}-\text{Nb}-\text{Br} < 90^\circ$ . The apical  $\text{Nb}-\text{Br}_{\text{trans-S}}$  distance is significantly shorter ( $2.4203(7) \text{ \AA}$ ) than those in the equatorial plane ( $2.4762(8)$ – $2.5113(8) \text{ \AA}$ ), whilst the  $\text{Nb}-\text{S}$  is long at  $2.7076(14) \text{ \AA}$ . This pattern of bond lengths and angles is replicated in  $[\text{NbCl}_5(\text{Me}_2\text{Se})]$ .

**Table SUP 1** Selected spectroscopic data for  $[\text{NbX}_5(\text{R}_2\text{E})]$  ( $\text{X} = \text{Cl}, \text{Br}$ ;  $\text{R} = \text{Me}, \text{Et}$ ;  $\text{E} = \text{S}, \text{Se}$ )

| Compound                                | IR. $\nu(\text{Nb}-\text{X})/\text{cm}^{-1}$ (Nujol) | $\delta(^{93}\text{Nb})^{[\text{a},\text{b}]}$ | $\delta(^{77}\text{Se}/^{125}\text{Te})^{[\text{a},\text{c}]}$ | UV/vis d. r./ $\text{cm}^{-1}$ |
|-----------------------------------------|------------------------------------------------------|------------------------------------------------|----------------------------------------------------------------|--------------------------------|
| $[\text{NbCl}_5(\text{Me}_2\text{S})]$  | 382(s), 343(m)                                       | +84 (1300)                                     |                                                                | 26200, 34150                   |
| $[\text{NbBr}_5(\text{Me}_2\text{S})]$  | 332(sh), 307(vs), 257(s)                             | +761 (900)<br>+752 (253 K)                     |                                                                | 24200, 28000 (sh), 32250       |
| $[\text{NbCl}_5(\text{Et}_2\text{S})]$  | 362(vs), 340(sh)                                     | +88 (1500)                                     |                                                                | 24500, 34000                   |
| $[\text{NbBr}_5(\text{Et}_2\text{S})]$  | 331(sh), 300(vs), 260(s)                             | +757 (1500)                                    |                                                                | 24400, 28000 (sh), 33700       |
| $[\text{NbCl}_5(\text{Me}_2\text{Se})]$ | 373(s), 340(sh)                                      | +103 (1300)                                    | 140                                                            | 22700, 25600, 32600            |
| $[\text{NbBr}_5(\text{Me}_2\text{Se})]$ | 332(sh), 310(s)                                      | +764 (1200)<br>+750 (253 K)                    | 128                                                            | 22270, 26800, 32400            |
| $[\text{NbCl}_5(\text{Me}_2\text{Te})]$ | 370(s), 345(sh)                                      | +135 (2500)<br>+153 (2200)<br>(273 K)          | 200                                                            | 21000 (vbr), 32000             |

[a] In anhydrous  $\text{CH}_2\text{Cl}_2$  at 295 K unless otherwise indicated. [b] Relative to  $[\text{NbCl}_6]^-$  in  $\text{MeCN}$ ,  $\delta = 0$ ,  $W_{1/2}$  in parenthesis in Hz. [c] Relative to neat external  $\text{Me}_2\text{Se}$  or  $\text{Me}_2\text{Te}$ .

**Table SUP 2** Selected bond lengths (Å) and angles (°) for [NbBr<sub>5</sub>(Me<sub>2</sub>S)]

|             |           |             |            |
|-------------|-----------|-------------|------------|
| Nb1–Br1     | 2.4203(7) | Nb1–Br2     | 2.5113(8)  |
| Nb1–Br3     | 2.4762(8) | Nb1–Br4     | 2.4775(7)  |
| Nb1–Br5     | 2.4830(8) | Nb1–S1      | 2.7076(14) |
|             |           |             |            |
| Br1–Nb1–Br2 | 97.44(3)  | Br2–Nb1–Br3 | 87.76(3)   |
| Br1–Nb1–Br3 | 97.33(3)  | Br2–Nb1–Br5 | 86.42(3)   |
| Br1–Nb1–Br4 | 96.74(3)  | Br3–Nb1–Br4 | 92.02(3)   |
| Br1–Nb1–Br5 | 96.99(3)  | Br4–Nb1–Br5 | 90.28(3)   |
| Br2–Nb1–S1  | 88.13(4)  | Br4–Nb1–S1  | 77.86(3)   |
| Br3–Nb1–S1  | 78.41(4)  | Br5–Nb1–S1  | 87.72(4)   |

**Table SUP 3** Selected bond lengths (Å) and angles (°) for [NbCl<sub>5</sub>(Me<sub>2</sub>Se)]

|             |            |             |            |
|-------------|------------|-------------|------------|
| Nb1–Cl1     | 2.2947(16) | Nb1–Cl2     | 2.3293(16) |
| Nb1–Cl3     | 2.3178(11) | Nb1–Cl4     | 2.3187(16) |
| Nb1–Se1     | 2.8163(9)  | Se1–C1      | 1.946(5)   |
|             |            |             |            |
| Cl1–Nb1–Cl2 | 96.91(6)   | Cl2–Nb1–Cl3 | 88.11(4)   |
| Cl1–Nb1–Cl3 | 97.38(3)   | Cl3–Nb1–Cl4 | 90.25(4)   |
| Cl1–Nb1–Cl4 | 95.87(6)   | Cl2–Nb1–Se1 | 83.91(4)   |
| Cl3–Nb1–Se1 | 82.63(3)   | Cl4–Nb1–Se1 | 83.31(4)   |

**Fig. SUP 1** Structure of [NbBr<sub>5</sub>(Me<sub>2</sub>S)] showing the atom numbering scheme. Ellipsoids are drawn at the 50% probability level and H atoms are omitted for clarity. There are two crystallographically distinct molecules in the asymmetric unit, the second of which involving Nb2 shows disorder at S2 (and the bonded C atoms)

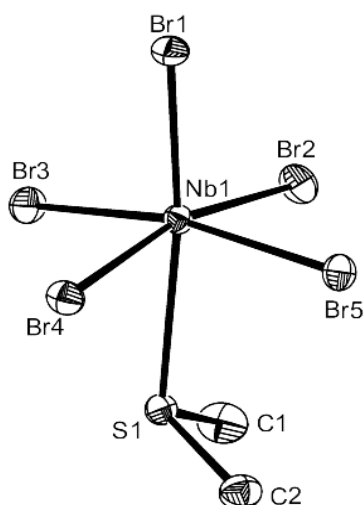

**Fig. SUP 2** Structure of [NbCl<sub>5</sub>(Me<sub>2</sub>Se)] showing the atom numbering scheme. Ellipsoids are drawn at the 50% probability level and H atoms are omitted for clarity. The molecule has mirror plane symmetry. Symmetry operation:  $a = 2 - x, y, z$ .

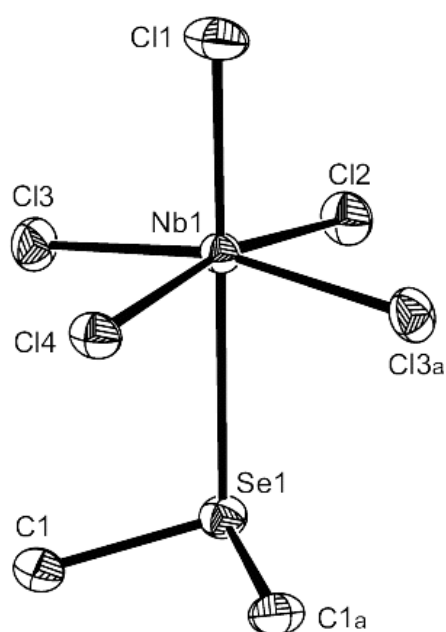

**X-ray Crystallography (SUP):** Summary details of the crystallographic data collection and refinement of [NbCl<sub>5</sub>(Me<sub>2</sub>Se)] and [NbBr<sub>5</sub>(Me<sub>2</sub>S)] are given in Table SUP 4.

Crystals were grown by refrigerating the filtrates from the syntheses for several days at  $-18\text{ }^{\circ}\text{C}$ . Data collection used a Nonius Kappa CCD diffractometer fitted with monochromated Mo- $K\alpha$  X-radiation ( $\lambda = 0.71073\text{ \AA}$ ) and with the crystals held at 120 K in a nitrogen gas stream. Structure solution and refinement were straightforward,<sup>22–24</sup> except as detailed below, with H atoms being placed in calculated positions using the default C–H distance. For  $[\text{NbBr}_5(\text{Me}_2\text{S})]$  with two molecules in the asymmetric unit, the Nb2 centred molecule showed disorder in the S atom position (S2), and this was modelled as two components (S2A/S2B) where ‘A’ was the major component (sof 0.60). The C atoms bonded to the S (C3, C4) overlapped and could not be separated into their A and B components however for the purposes of adding H atoms in calculated positions they were treated as A and B using EXYZ and EADP commands on C3A/B and C4A/B.

**Table SUP 4** Crystal data and structure refinement details for [NbCl<sub>5</sub>(Me<sub>2</sub>Se)] and [NbBr<sub>5</sub>(Me<sub>2</sub>S)]<sup>a</sup>

| Compound                                                                                 | [NbCl <sub>5</sub> (Me <sub>2</sub> Se)]           | [NbBr <sub>5</sub> (Me <sub>2</sub> S)]           |
|------------------------------------------------------------------------------------------|----------------------------------------------------|---------------------------------------------------|
| Formula                                                                                  | C <sub>2</sub> H <sub>6</sub> Cl <sub>5</sub> NbSe | C <sub>2</sub> H <sub>6</sub> Br <sub>5</sub> NbS |
| <i>M</i>                                                                                 | 379.19                                             | 554.59                                            |
| Crystal system                                                                           | Orthorhombic                                       | Monoclinic                                        |
| Space group (no.)                                                                        | <i>Cmc</i> 2 <sub>1</sub> (36)                     | <i>P</i> 2 <sub>1</sub> / <i>c</i> (14)           |
| <i>a</i> / Å                                                                             | 7.999(2)                                           | 7.2922(5)                                         |
| <i>b</i> / Å                                                                             | 11.924(3)                                          | 23.641(3)                                         |
| <i>c</i> / Å                                                                             | 10.796(3)                                          | 12.9072(10)                                       |
| $\alpha$ / °                                                                             | 90                                                 | 90                                                |
| $\beta$ / °                                                                              | 90                                                 | 92.267(5)                                         |
| $\gamma$ / °                                                                             | 90                                                 | 90                                                |
| <i>U</i> / Å <sup>3</sup>                                                                | 1029.7(5)                                          | 2223.4(4)                                         |
| <i>Z</i>                                                                                 | 4                                                  | 8                                                 |
| $\mu$ (Mo-K $\alpha$ ) / mm <sup>-1</sup>                                                | 5.927                                              | 19.174                                            |
| <i>F</i> (000)                                                                           | 712                                                | 2000                                              |
| Total number reflections                                                                 | 4290                                               | 24010                                             |
| <i>R</i> <sub>int</sub>                                                                  | 0.050                                              | 0.038                                             |
| Unique reflections                                                                       | 1179                                               | 5097                                              |
| No. of parameters, restraints                                                            | 50, 1                                              | 175, 2                                            |
| <i>R</i> <sub>1</sub> , <i>wR</i> <sub>2</sub> [ <i>I</i> > 2σ( <i>I</i> )] <sup>b</sup> | 0.025, 0.058                                       | 0.034, 0.066                                      |
| <i>R</i> <sub>1</sub> , <i>wR</i> <sub>2</sub> (all data)                                | 0.027, 0.060                                       | 0.049, 0.073                                      |

a Common items: temperature = 120 K; wavelength (Mo-K $\alpha$ ) = 0.71073 Å;  $\theta$ (max) = 27.5°.

b  $R_1 = \sum ||F_o| - |F_c|| / \sum |F_o|$ ;  $wR_2 = [\sum w(F_o^2 - F_c^2)^2 / \sum wF_o^4]^{1/2}$
